# Supplementary material for: Characterization and Comparison of Bioactive Polysaccharides from Grifola frondosa by HPSEC-MALLS-RID and Saccharide Mapping Based on HPAEC-PAD
Source: MDPI journal article supplement (doi:10.3390/polym15010208), 2022-12-31
Supplement: s1 [file s1]

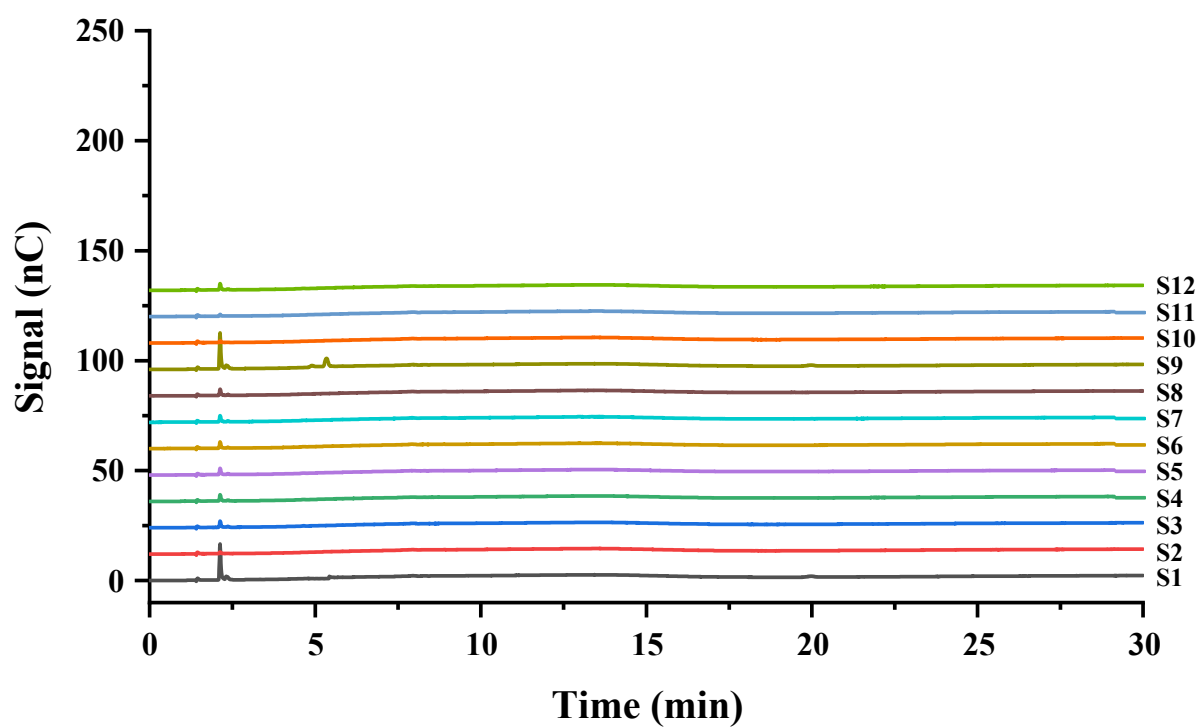

**Figure S1.** The HPAEC-PAD profiles of different hydrolysates from GFPs before hydrolysis

**Table S1** Monosaccharide composition of the polysaccharides from *G. frondose*

| Code | Molar ratios |           |         |        |         |
|------|--------------|-----------|---------|--------|---------|
|      | Fucose       | Galactose | Glucose | Xylose | Mannose |
| S1   | 1.00         | 2.34      | 2.80    | 0.03   | 1.37    |
| S2   | 1.00         | 2.26      | 3.28    | 0.03   | 1.39    |
| S3   | 1.00         | 2.17      | 4.07    | 0.02   | 1.46    |
| S4   | 1.00         | 2.23      | 4.22    | 0.02   | 1.53    |
| S5   | 1.00         | 2.13      | 8.95    | 0.10   | 1.75    |
| S6   | 1.00         | 2.23      | 11.76   | 0.09   | 1.74    |
| S7   | 1.00         | 1.94      | 6.97    | 0.12   | 1.58    |
| S8   | 1.00         | 2.37      | 4.81    | 0.02   | 1.38    |
| S9   | 1.00         | 2.27      | 8.28    | 0.06   | 1.65    |
| S10  | 1.00         | 2.18      | 8.82    | 0.06   | 1.68    |
| S11  | 1.00         | 1.95      | 1.92    | 0.03   | 1.40    |
| S12  | 1.00         | 1.85      | 1.84    | 0.02   | 1.31    |

**Table S2** Effects of polysaccharides from *G. frondose* (GFPs) on RAW 264.7 cells viability

| Code | Cell viability (% control)       |                               |                                 |                                 |                                 | IC <sub>10</sub> (μg·mL <sup>-1</sup> ) |
|------|----------------------------------|-------------------------------|---------------------------------|---------------------------------|---------------------------------|-----------------------------------------|
|      | 10 μg·mL <sup>-1</sup>           | 20 μg·mL <sup>-1</sup>        | 40 μg·mL <sup>-1</sup>          | 80 μg·mL <sup>-1</sup>          | 160 μg·mL <sup>-1</sup>         |                                         |
| S1   | 113.05 ± 5.34 <sup>ab,***</sup>  | 108.18 ± 5.53 <sup>a,*</sup>  | 101.81 ± 0.46 <sup>a</sup>      | 92.36 ± 0.41 <sup>a</sup>       | 78.51 ± 3.49 <sup>ab,***</sup>  | 108.60                                  |
| S2   | 107.06 ± 5.31 <sup>bcd</sup>     | 105.51 ± 3.79 <sup>ab</sup>   | 97.52 ± 3.32 <sup>ab</sup>      | 87.36 ± 3.29 <sup>bc,***</sup>  | 76.14 ± 6.20 <sup>abc,***</sup> | 84.62                                   |
| S3   | 116.17 ± 4.34 <sup>a,***</sup>   | 108.70 ± 2.2 <sup>a,*</sup>   | 94.74 ± 2.61 <sup>bc</sup>      | 84.65 ± 1.45 <sup>c,***</sup>   | 77.40 ± 1.26 <sup>ab,***</sup>  | 81.21                                   |
| S4   | 88.11 ± 2.36 <sup>f,***</sup>    | 87.20 ± 3.09 <sup>d,***</sup> | 81.92 ± 0.77 <sup>def,***</sup> | 73.65 ± 1.39 <sup>f,***</sup>   | 69.71 ± 2.71 <sup>cde,***</sup> | 8.48                                    |
| S5   | 106.51 ± 2.48 <sup>bcd</sup>     | 91.77 ± 3.72 <sup>d,*</sup>   | 86.52 ± 1.80 <sup>d,***</sup>   | 79.87 ± 4.38 <sup>d,***</sup>   | 64.37 ± 2.90 <sup>e,***</sup>   | 37.22                                   |
| S6   | 87.53 ± 0.74 <sup>f,***</sup>    | 89.12 ± 2.62 <sup>d,***</sup> | 84.30 ± 2.72 <sup>de,***</sup>  | 75.73 ± 1.40 <sup>def,***</sup> | 72.21 ± 3.77 <sup>bcd,***</sup> | 10.06                                   |
| S7   | 98.94 ± 0.93 <sup>c</sup>        | 87.28 ± 1.32 <sup>d,***</sup> | 79.11 ± 2.97 <sup>f,***</sup>   | 75.00 ± 1.46 <sup>ef,***</sup>  | 63.42 ± 0.70 <sup>e,***</sup>   | 17.70                                   |
| S8   | 110.24 ± 5.37 <sup>abc,***</sup> | 108.58 ± 2.04 <sup>a,*</sup>  | 97.69 ± 4.43 <sup>ab</sup>      | 90.12 ± 2.89 <sup>ab,**</sup>   | 82.55 ± 2.15 <sup>a,***</sup>   | 106.90                                  |
| S9   | 109.62 ± 4.75 <sup>abc,**</sup>  | 103.77 ± 5.46 <sup>abc</sup>  | 92.52 ± 3.58 <sup>c</sup>       | 85.08 ± 1.33 <sup>c,***</sup>   | 72.18 ± 6.64 <sup>bcd,***</sup> | 68.01                                   |
| S10  | 100.86 ± 3.15 <sup>de</sup>      | 99.81 ± 1.35 <sup>bc</sup>    | 91.68 ± 0.56 <sup>c,*</sup>     | 75.54 ± 3.80 <sup>def,***</sup> | 67.98 ± 1.76 <sup>de,***</sup>  | 43.10                                   |
| S11  | 103.77 ± 4.02 <sup>cde</sup>     | 88.63 ± 6.25 <sup>d,***</sup> | 81.50 ± 1.87 <sup>ef,***</sup>  | 67.49 ± 2.24 <sup>g,***</sup>   | 67.11 ± 2.47 <sup>de,***</sup>  | 19.75                                   |
| S12  | 106.86 ± 4.54 <sup>bcd</sup>     | 98.48 ± 4.27 <sup>c</sup>     | 86.08 ± 2.82 <sup>de,***</sup>  | 79.04 ± 1.37 <sup>de,***</sup>  | 67.73 ± 3.98 <sup>de,***</sup>  | 42.33                                   |

Note: Data were presented as percentage of absorbance ratio between sample-treated groups and control groups, and as means ± standard deviations (n = 3). The cell viability cells at different treated concentration were marked separately by different letters with significant difference ( $p < 0.05$ ). \*,  $p < 0.05$ ; \*\*,  $p < 0.01$ ; \*\*\*,  $p < 0.001$  were labeled versus vehicle control which was defined as 100%.
